# Supplementary material
Source: Springer Nature journal article supplement (https://www.springermedizin.de/resource/supplementary/12885_2011_3009_MOESM1_ESM.pdf/9462454)

a)

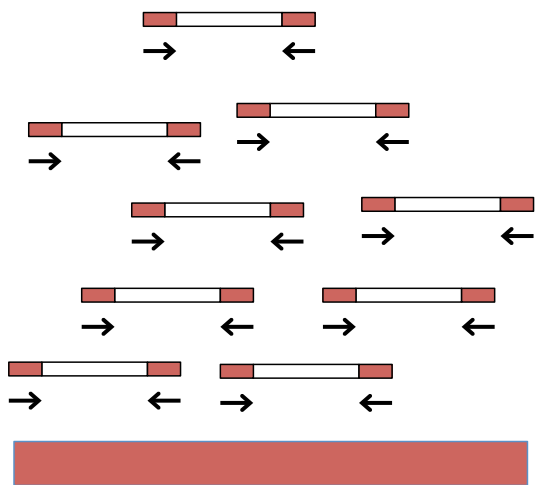

Chrom 2

b)

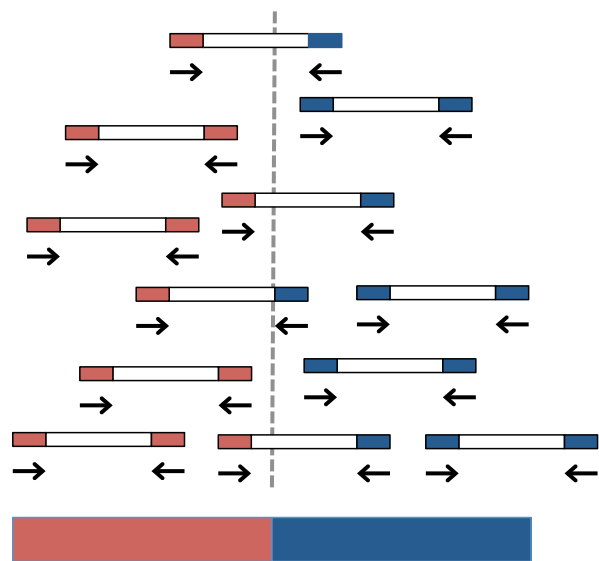

Chrom 7

Chrom 15

c)

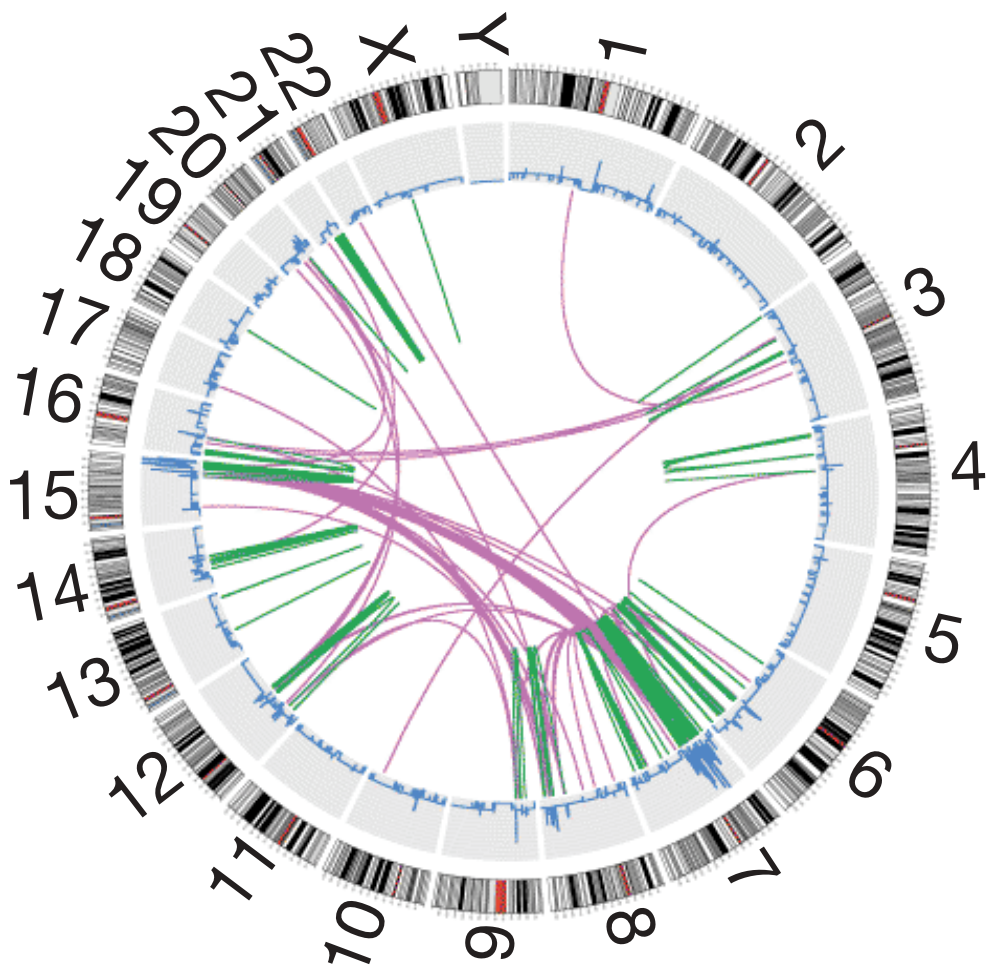

Supplement: MOESM1 [file 9462454]
